# Supplementary material
Source: publisher figshare collection journal article supplement (https://tandf.figshare.com/articles/dataset/_/21829266)
Supplement: Supplementary file 1 [file 1]

## Rozszerzona perspektywa traumy i zdrowienia: ujęcie socjointerepersonalne PTSD

Andreas Maercker

Zaburzenie po stresie traumatycznym (PTSD) jest jednym z najczęstszych zaburzeń psychicznych, do którego wymagane jest wystąpienie traumatycznego stresora oraz określonego kontekstu środowiskowego. Zarówno trauma, jak i wyzdrowienie z niej wymaga określonego kontekstu środowiskowego. Analiza PTSD z perspektywy socjo-interpersonalnej (Maercker & Horn, 2013) jest jednym z nowszych podejść do badań nad tym zaburzeniem. W perspektywie tej wymienia się trzy punkty widzenia, z których można spoglądać na PTSD: społeczną, bliskich relacji interpersonalnych oraz kulturową. Artykuł ten rozszerza spojrzenie na PTSD z tej perspektywy oraz nakreśla kierunki psychoterapii PTSD, biorące pod uwagę ujęcie socjointerepersonalne.

Keywords: no keywords

Name of translator: Marcin Rzeszutek, University of Finance and Management in Warsaw, Poland

**Citation:** European Journal of Psychotraumatology 2015, 6: 29303 - <http://dx.doi.org/10.3402/ejpt.v6.29303>
