# Supplementary material
Source: publisher figshare collection journal article supplement (https://tandf.figshare.com/articles/dataset/_/21829266)
Supplement: Supplementary file 2 [file 1]

## **Расширение перспектив понятия травмы и восстановления: социально-межличностный взгляд на ПТСР**

Andreas Maercker, Tobias Hecker

Посттравматическое стрессовое расстройство (ПТСР) является одним из немногих психических заболеваний, которое по определению в качестве предварительного условия для установления диагноза требует наличия травматического события или событий. Посттравматические осложнения и восстановление всегда происходят в социально-межличностных контекстах, например, во взаимодействии с партнером, семьей, окружением и обществом. В настоящей статье предложена переработанная и расширенная социально-межличностная структурная модель ПТСР (Maercker & Horn, 2013). Она была разработана в дополнение к другим внутриличностным моделям ПТСР, которые придают особое значение альтерациям памяти, когний или нейробиологии индивидуума. Обсуждаются четыре основные причины для расширения перспектив перехода от личностных к межличностно-социальным контекстам. Представлены три слоя модели (социальные воздействия, близкие отношения, культура и общество). Затем мы обсуждаем дополнительные идеи и преимущества социально-межличностного подхода в развитии исследований, касающихся восстановления после приобретения травматического опыта. Статья завершается обзором перспектив посттравматической терапии с учетом этого более широкого социально-межличностного взгляда на ПТСР.

Name of translator: Marina Shcherbak

Citation: European Journal of Psychotraumatology 2016, 7: 29303 - <http://dx.doi.org/10.3402/ejpt.v7.29303>
